# Supplementary material for: The Transmembrane Protease Serine 2 (TMPRSS2) Non-Protease Domains Regulating Severe Acute Respiratory Syndrome Coronavirus 2 (SARS-CoV-2) Spike-Mediated Virus Entry
Source: MDPI journal article supplement (doi:10.3390/v15102124), 2023-10-19
Supplement: s1 [file s1]

## Supplementary

# The Transmembrane Protease Serine 2 (TMPRSS2) Non-Protease Domains Regulating Severe Acute Respiratory Syndrome Coronavirus 2 (SARS-CoV-2) Spike-Mediated Virus Entry

Romano Strobel, Julia Adler and Yosef Shaul \*

Department of Molecular Genetics, Weizmann Institute of Science, Rehovot 7610001, Israel

\* Correspondence: yosef.shaul@weizmann.ac.il

## Supplementary Figures

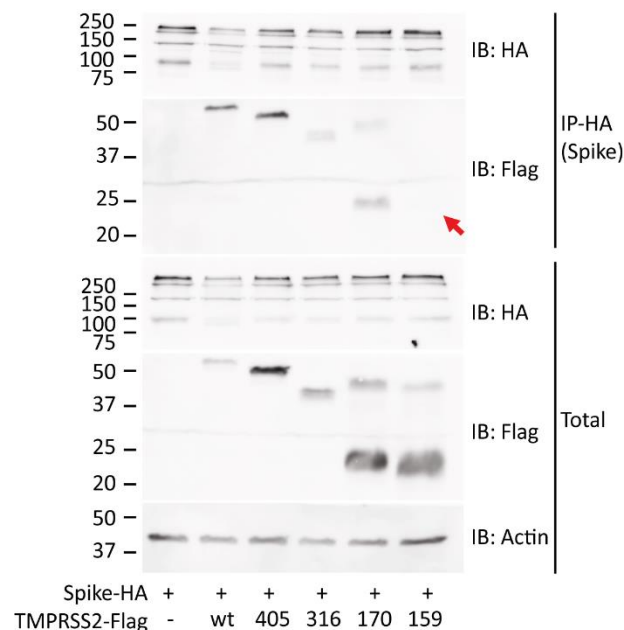

**Figure S1: The reciprocal experiment from WB Figure 3b** Mapping the Spike-TMPRSS2 interacting region. HEK293T were transfected with the indicated plasmids and IPed with HA-beads and WB were performed as above. Red arrow shows the expected location of the 1-159-TMPRSS2-Flag band within IP-Flag blot.

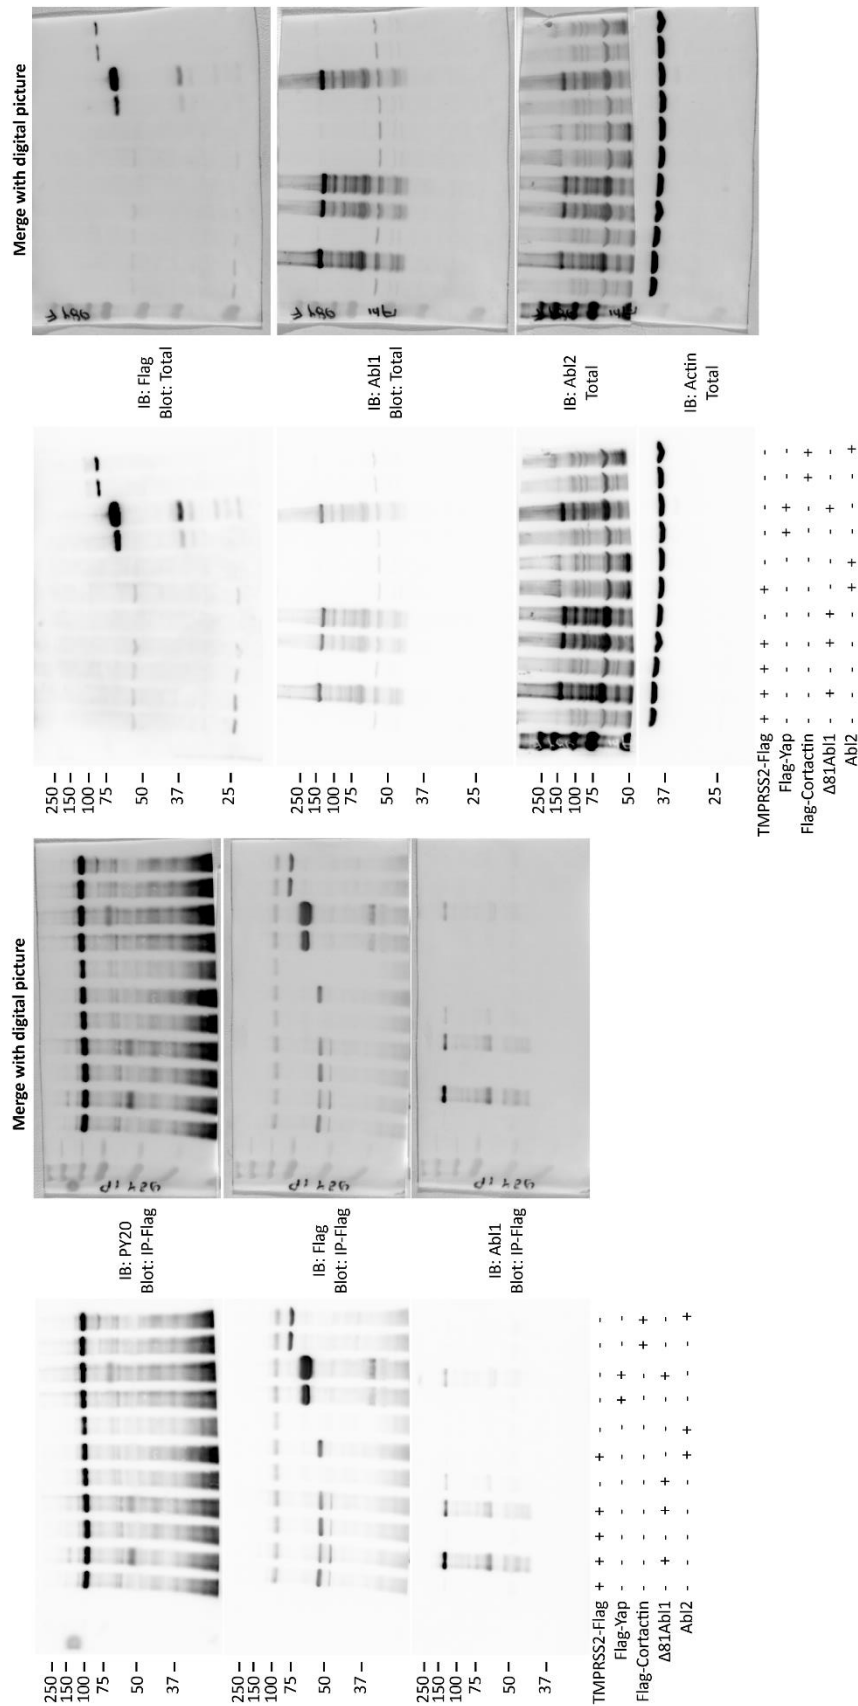

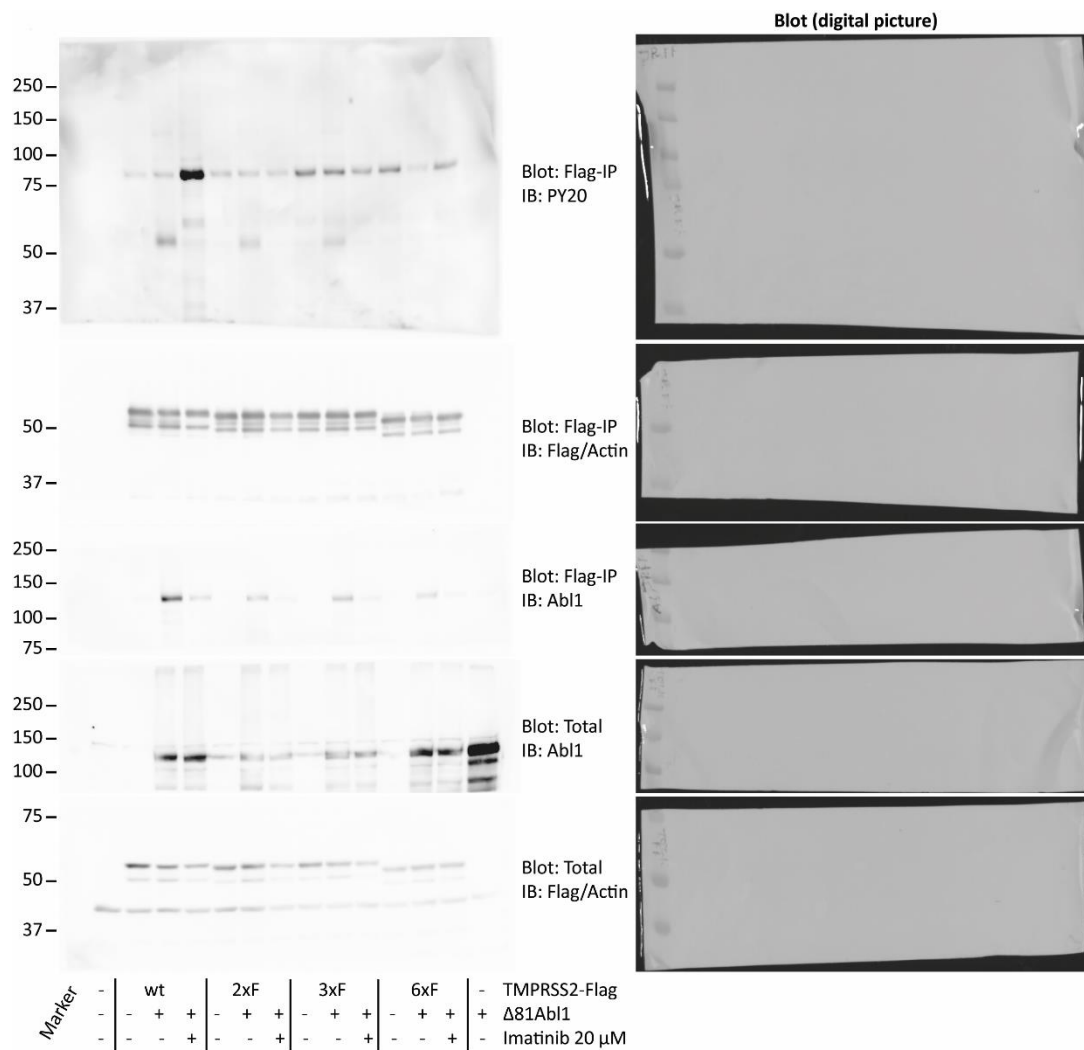

**Figure S3: Original western blot image from Flag-IP Figure 1c.** Blots were cut between lane 75 kDa and treated with indicated antibodies. The Flag-IP blot was cut after analysis of PY20 antibody treatment.

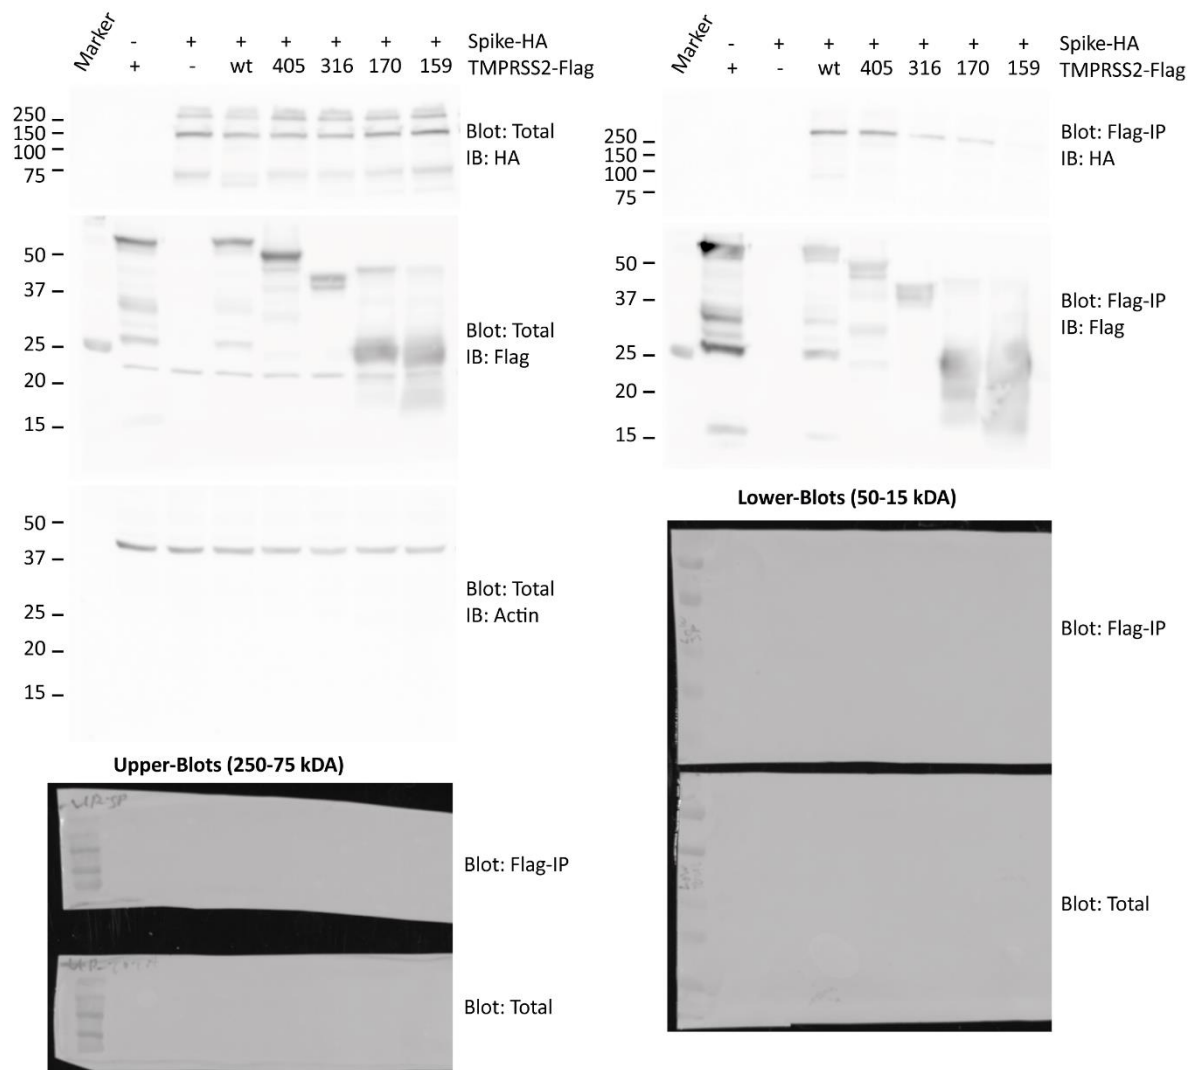

**Figure S4: Original western blot image from Flag-IP Figure 3b.** Blots were cut between lane 75 kDa and the upper blots were treated with Anti-mouse-HA (TMPRSS2) antibodies while lower blots was treated with Anti-rabbit-Flag (Spike) and two days later with Anti-mouse-Actin antibodies.

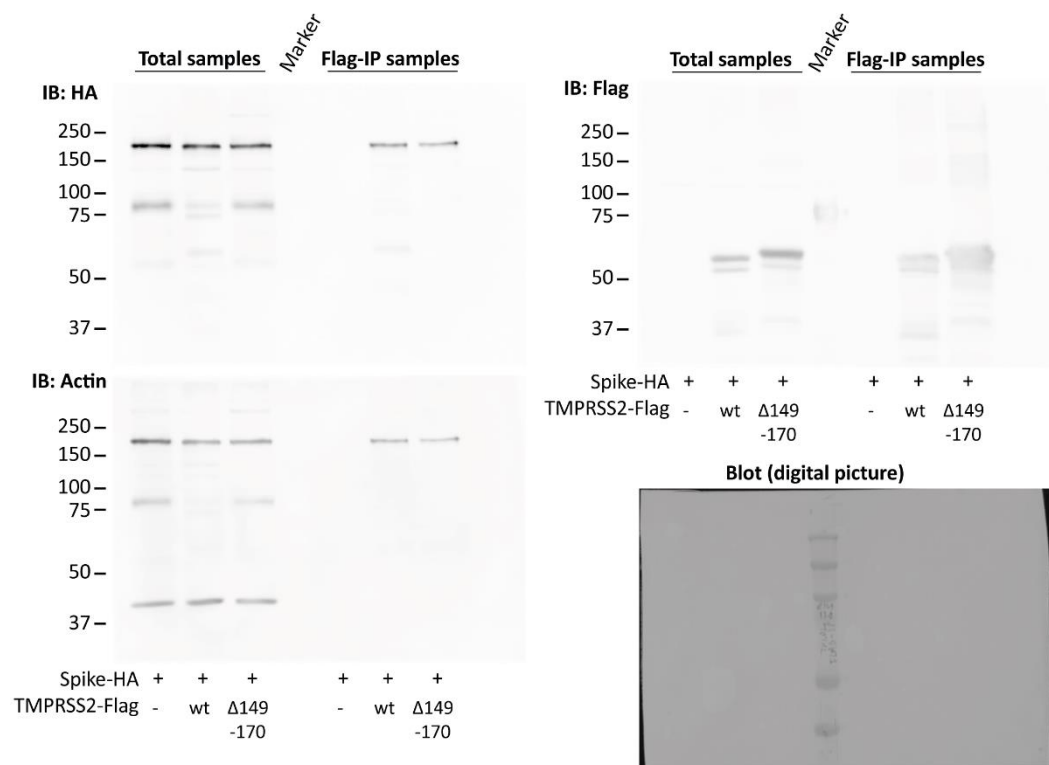

**Figure S5: Original western blot image from Flag-IP Figure 3d.** Blot was incubated and re-stained in following order: 1) Anti-mouse-HA (Spike), 2) Anti-rabbit-Flag (TMPRSS2) and 3) Anti-mouse-Actin.

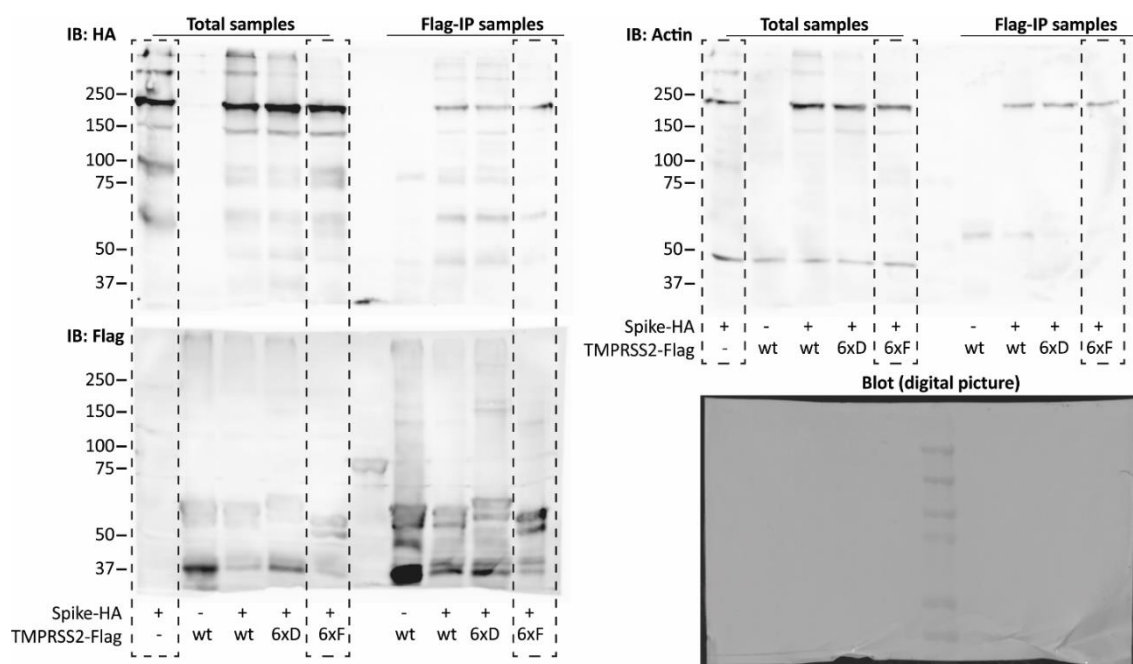

**Figure S6: Original western blot image from Flag-IP Figure 4a.** Dashed box shows excluded lanes from figure 4a in main text. Blots were incubated and re-stained in following order: 1) Anti-mouse-HA (Spike), 2) Anti-rabbit-Flag (TMPRSS2) and 3) Anti-mouse-Actin.

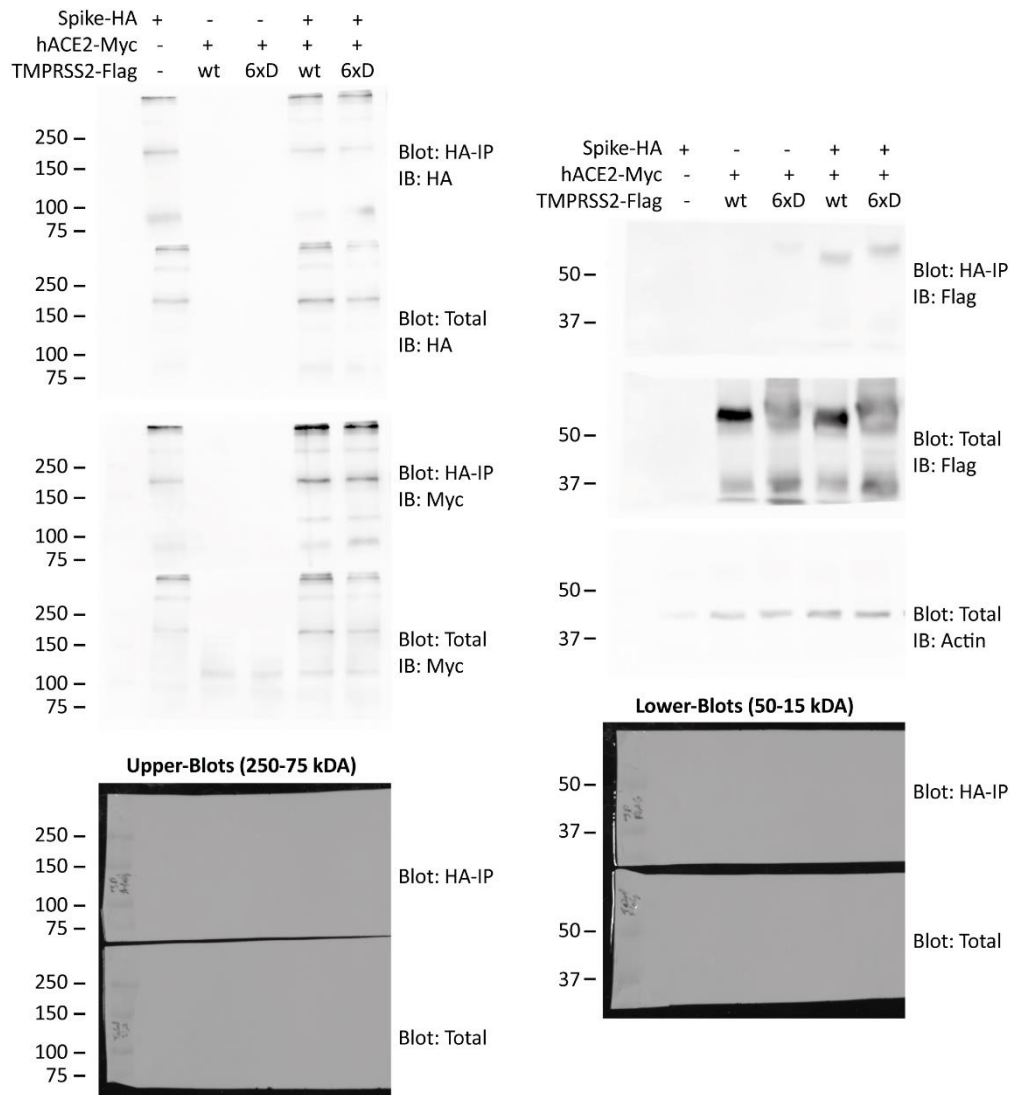

**Figure S7: Original western blot image from Flag-IP Figure 4c.** Blots were cut between lane 75 kDa and the upper blots were treated with Anti-mouse-HA (Spike) and anti-Myc (hACE2) antibodies while lower blots was treated with Anti-rabbit-Flag (TMPRSS2) and with Anti-mouse-Actin antibodies. Result was verified with an additional experiment.

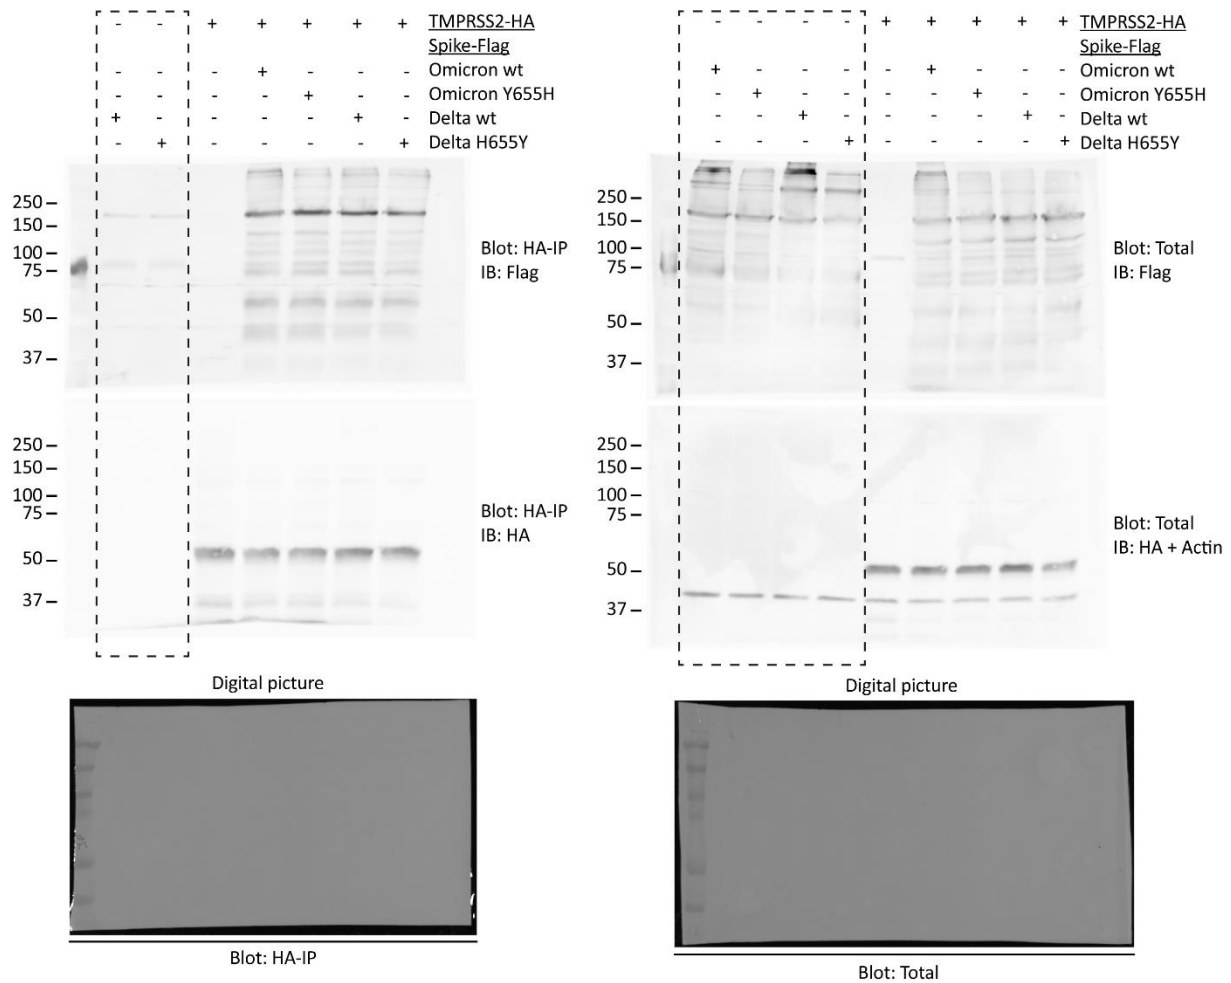

**Figure S8: Original western blot image from Flag-IP Figure 5b.** Dashed box shows excluded lanes from figure 5b in main text. Blots were incubated and re-stained in following order: 1) Anti-rabbit-Flag (Spike), 2) Anti-mouse-HA (TMPRSS2) + Anti-mouse-Actin.

## Supplementary Table

Supplement Table S1: List of Primer used for cloning of described constructs.

| Name                      | Sequence                                                              |
|---------------------------|-----------------------------------------------------------------------|
| TMPRSS2_Fw_NheI           | AATTGCTAGCGGGCCCATGGCTTTGAACTCAGGGTCACC                               |
| TMPRSS2_Rv_Flag_XbaI      | AATTTCTAGATTACTTGTCGTCATCGTCTTTGTAGTCGCCGTCTGC<br>C<br>CTCATTGTGCGATA |
| TMPRSS2_Rv_HA-tag_XbaI    | AATTTCTAGATTAtgcataatccggaacatcatcacggataGCCGTCTGCCCT<br>CATTGTGCGATA |
| TMPRSS2-1347_Rv_Flag_XbaI | CCAATTTCTAGATTACTTGTCGTCATCGTCTTTGTAGTCCTTCGAA<br>GT<br>GACCAGAGG     |
| TMPRSS2-1215_Rv_Flag_XbaI | CCAATTTCTAGATTACTTGTCGTCATCGTCTTTGTAGTCAATGAGa<br>AG<br>CAccTTGGC     |
| TMPRSS2-1083_Rv_Flag_XbaI | CCAATTTCTAGATTACTTGTCGTCATCGTCTTTGTAGTCCACTAGG<br>TC<br>GTTGAAAGT     |
| TMPRSS2-948_Rv_Flag_XbaI  | CCAATTTCTAGATTACTTGTCGTCATCGTCTTTGTAGTCTCTCAAA<br>AT<br>CCCCGCAAA     |
| TMPRSS2-513_Rv_Flag_XbaI  | CCAATTTCTAGATTACTTGTCGTCATCGTCTTTGTAGTCAGGGTGC<br>C<br>AGGACTTCCT     |
| TMPRSS2-477_Rv_Flag_XbaI  | GGGCCCTCTAGATTACTTGTCGTCATCGTCTTTGTAGTCCTGAAG<br>G<br>ATGAAGTTTGG     |
| TMPRSS2-444_Rv_Flag_XbaI  | GGGCCCTCTAGATTACTTGTCGTCATCGTCTTTGTAGTCACACCGA<br>T<br>TCTCGTCCTC     |
| TMPRSS2-411_Rv_Flag_XbaI  | CCAATTTCTAGATTACTTGTCGTCATCGTCTTTGTAGTCTGACACG<br>C<br>CATCACACCA     |
| TMPRSS2_dAA149-170_Fw     | GGACGAGAATCGGTGTGTGTGCCAAGACGACT                                      |
| TMPRSS2_dAA149-170_Rv     | AGTCGTCTTGGCACACACACCGATTCTCGTCC                                      |
| TMPRSS2_Rv-YY-FF_P-dead   | CACGGGGGACGGGAGaAGaACTGAGCCGGATG                                      |
| TMPRSS2_Fw-YY-FF_P-dead   | CATCCGGCTCAGTtCTtCCCCGTCCCCCGTG                                       |
| TMPRSS2_Rv-YY-DD_P-mim    | ACGGGGGACGGGTcGTcCTGAGCCGGATGCAC                                      |
| TMPRSS2_Fw-YY-DD_P-mim    | TGCATCCGGCTCAGgACgACCCGTCCCCCG                                        |
| TMPRSS2-Y52_Fw-Y-F        | CCCGTGCCCCAGTtCGCCCCGAGGGTCCTG                                        |



|                                    |                                                                                    |
|------------------------------------|------------------------------------------------------------------------------------|
| <b>TMPRSS2-Y52_Rv-Y-F</b>          | GACCCTCGGGGCGaACTGGGGCACGGGGGA                                                     |
| <b>6xf-TMPRSS2-Fw_NheI</b>         | CTATAGgctagcGGGCCCACCATGGCTTTGAACTCAGGGTCACCAC<br>CAGCTATTGGACCTTtCTtTGAAAACCATGGA |
| <b>6xf-TMPRSS2-Rv</b>              | GACCCTCGGGGCGaACTGGGGCACGGGGGACGGGAAGAACTGA<br>GCCGGATGCACCTCGaAGACAGTGGGGAC       |
| <b>6xd-TMPRSS2-Fw_NheI</b>         | CTATAGgctagcGGGCCCACCATGGCTTTGAACTCAGGGTCACCAC<br>CAGCTATTGGACCTgACgATGAAAACCATGGA |
| <b>6xd-TMPRSS2-Rv</b>              | GACCCTCGGGGCGTcCTGGGGCACGGGGGACGGGTcGTcCTGAG<br>C<br>CGGATGCACCTCGTcGACAGTGGGGAC   |
| <b>Spike_Fw_NheI_pcDNA3.1</b>      | aagctggctagcatgttcgtgttcct                                                         |
| <b>Spike-Flag_Rv_XhoI_pcDNA3.1</b> | ATGCCcctcgagTCActtgtcgtcatcgtctttgtagtctgtatagtGcagtttgacg<br>cccttc               |
